# Supplementary material
Source: PubMed Central journal article supplement (PMC4941132)
Supplement: jnnp-2015-310750-s1.pdf [file jnnp-2015-310750-s1.pdf]

eTable 1. Participant characteristics by occupational formaldehyde exposure status, National Longitudinal Mortality Study, 1973-2011

| Characteristic                                       | Men                  |         |             |         | Women                |         |             |         |
|------------------------------------------------------|----------------------|---------|-------------|---------|----------------------|---------|-------------|---------|
|                                                      | Exposed <sup>†</sup> |         | Not exposed |         | Exposed <sup>†</sup> |         | Not Exposed |         |
|                                                      | N                    | (%)     | N           | (%)     | N                    | (%)     | N           | (%)     |
| Race/ethnicity                                       |                      |         |             |         |                      |         |             |         |
| White, non-Hispanic                                  | 134293               | (71.77) | 461905      | (76.04) | 93072                | (69.13) | 399211      | (73.92) |
| Black, non-Hispanic                                  | 14399                | (7.69)  | 45761       | (7.53)  | 17109                | (12.71) | 54553       | (10.10) |
| Hispanic                                             | 26317                | (14.06) | 59748       | (9.84)  | 13898                | (10.32) | 51674       | (9.57)  |
| Other, non-Hispanic                                  | 7835                 | (4.19)  | 28596       | (4.71)  | 7700                 | (5.72)  | 26055       | (4.82)  |
| Missing                                              | 4281                 | (2.29)  | 11407       | (1.88)  | 2850                 | (2.12)  | 8572        | (1.59)  |
| Education                                            |                      |         |             |         |                      |         |             |         |
| <High School                                         | 48129                | (25.72) | 84776       | (13.96) | 25109                | (18.65) | 60005       | (11.11) |
| High School                                          | 73406                | (39.23) | 193842      | (31.91) | 46998                | (34.91) | 199930      | (37.02) |
| Some College                                         | 34093                | (18.22) | 138919      | (22.87) | 35415                | (26.31) | 133213      | (24.67) |
| College graduate                                     | 15610                | (8.34)  | 116438      | (19.17) | 18399                | (13.67) | 94300       | (17.46) |
| Postgraduate                                         | 15854                | (8.47)  | 73344       | (12.07) | 8690                 | (6.45)  | 52564       | (9.73)  |
| Missing                                              | 33                   | (0.02)  | 98          | (0.02)  | 18                   | (0.01)  | 53          | (0.01)  |
| Household income as a percentage of the poverty line |                      |         |             |         |                      |         |             |         |
| <=200                                                | 52538                | (28.08) | 103650      | (17.06) | 35519                | (26.38) | 115021      | (21.30) |
| 201-300                                              | 38216                | (20.42) | 107303      | (17.67) | 26131                | (19.41) | 97904       | (18.13) |
| 301-500                                              | 49751                | (26.59) | 180826      | (29.77) | 36417                | (27.05) | 154560      | (28.62) |
| >500                                                 | 38276                | (20.45) | 190363      | (31.34) | 30385                | (22.57) | 149520      | (27.69) |
| Missing                                              | 8344                 | (4.46)  | 25275       | (4.16)  | 6177                 | (4.59)  | 23060       | (4.27)  |

<sup>†</sup>Potential exposure includes any person with a job exposure intensity>0 or a job exposure probability>0.

eTable 2. Adjusted hazard ratios (HR)<sup>†</sup> and 95% confidence intervals (CI) for ALS mortality by level of occupational formaldehyde exposure, National Longitudinal Mortality Study, women ages 25 years and older, 1973-2011

|                                                           | <b>Respondents</b> | <b>Person-<br/>years</b> | <b>ALS<br/>deaths</b> | <b>HR (95% CI)<sup>†</sup></b> |
|-----------------------------------------------------------|--------------------|--------------------------|-----------------------|--------------------------------|
| <b>Probability</b>                                        |                    |                          |                       |                                |
| Unexposed                                                 | 540,065            | 8,720,055                | 224                   | 1.0 (Reference)                |
| Low                                                       | 44,714             | 845,175                  | 29                    | 1.31 (0.90, 1.93)              |
| Medium                                                    | 89,340             | 1,383,436                | 32                    | 1.02 (0.71, 1.47)              |
| High                                                      | 575                | 10,592                   | 0                     | ---                            |
| <b>Intensity</b>                                          |                    |                          |                       |                                |
| Unexposed                                                 | 540,065            | 8,720,055                | 224                   | 1.0 (Reference)                |
| Low                                                       | 69,311             | 1,164,134                | 33                    | 1.19 (0.83, 1.70)              |
| Medium                                                    | 62,300             | 1,024,504                | 27                    | 1.06 (0.71, 1.59)              |
| High                                                      | 3,018              | 50,458                   | 1                     | 1.35 (0.23, 7.97)              |
| <b>Intensity (exposed restricted to probability=high)</b> |                    |                          |                       |                                |
| Unexposed                                                 | 540,065            | 8,720,055                | 224                   | 1.0 (Reference)                |
| Low                                                       | 0                  | 0                        | 0                     | --                             |
| Medium                                                    | 476                | 9,382                    | 0                     | --                             |
| High                                                      | 99                 | 1,210                    | 0                     | --                             |

<sup>†</sup>Adjusted for race/ethnicity, education, and household income as a percentage of the poverty line.
